# Supplementary material
Source: publisher figshare collection journal article supplement (https://acs.figshare.com/ndownloader/files/24159264)
Supplement: Supplementary file 1 [file 24159264]

## Sheet: Table S7
Table S7. Skyline report with experimental data on precursor ions from the nine swabs from COVID-19 patients.
Protein Name	Peptide Modified Sequence	Replicate Name	Precursor Mz	Precursor Charge	Total Area	Isotope Dot Product	Average Mass Error PPM	Max Height	Best Retention Time	Identified	Peptide Retention Time	Missed Cleavages
hCoV-19/Italy/INMI1-isl/2020|EPI_ISL_410545|2020-01-29_M	EITVATSR	Q10845_MS20-028_naso1	438.743	2	310219	0.6023	0.1	465047	14.24+/-0.95	FALSE	14.99	0
hCoV-19/Italy/INMI1-isl/2020|EPI_ISL_410545|2020-01-29_M	EITVATSR	Q10846_MS20-028_naso2	438.743	2	789350	0.7285	0.2	489125	14.24+/-0.95	FALSE	13.55	0
hCoV-19/Italy/INMI1-isl/2020|EPI_ISL_410545|2020-01-29_M	EITVATSR	Q10847_MS20-028_naso3	438.743	2	1434199	0.9479	-2	513562	14.24+/-0.95	ALIGNED	13.91	0
hCoV-19/Italy/INMI1-isl/2020|EPI_ISL_410545|2020-01-29_N	LDDKDPNFK	Q10851_MS20-028_naso8	546.272	2	32536938	0.9612	0.3	2553111	11.91+/-1.03	TRUE	12.57	1
hCoV-19/Italy/INMI1-isl/2020|EPI_ISL_410545|2020-01-29_M	EITVATSR	Q10849_MS20-028_naso5	438.743	2	1022161	0.3878	1	1124525	14.24+/-0.95	ALIGNED	15.86	0
hCoV-19/Italy/INMI1-isl/2020|EPI_ISL_410545|2020-01-29_M	EITVATSR	Q10850_MS20-028_naso6	438.743	2	42305	0.6023	-2.2	182677	14.24+/-0.95	ALIGNED	13.12	0
hCoV-19/Italy/INMI1-isl/2020|EPI_ISL_410545|2020-01-29_M	EITVATSR	Q10841_MS20-028_naso7_test_incl-only_z	438.743	2	380062	0.826	0.8	250913	14.24+/-0.95	ALIGNED	13.96	0
hCoV-19/Italy/INMI1-isl/2020|EPI_ISL_410545|2020-01-29_M	EITVATSR	Q10848_MS20-028_naso4	438.743	2	6534541	0.7988	-0.1	944690	14.24+/-0.95	TRUE	13.48	0
hCoV-19/Italy/INMI1-isl/2020|EPI_ISL_410545|2020-01-29_M	EITVATSR	Q10852_MS20-028_naso9	438.743	2	0	0	#N/A	0	14.24+/-0.95	ALIGNED	#N/A	0
hCoV-19/Italy/INMI1-isl/2020|EPI_ISL_410545|2020-01-29_N	GFYAEGSR	Q10845_MS20-028_naso1	443.706	2	0	0	#N/A	0	15.93+/-1.06	ALIGNED	#N/A	0
hCoV-19/Italy/INMI1-isl/2020|EPI_ISL_410545|2020-01-29_N	GFYAEGSR	Q10846_MS20-028_naso2	443.706	2	0	0	#N/A	0	15.93+/-1.06	ALIGNED	#N/A	0
hCoV-19/Italy/INMI1-isl/2020|EPI_ISL_410545|2020-01-29_N	GFYAEGSR	Q10847_MS20-028_naso3	443.706	2	6404982	0.9684	0.8	587580	15.93+/-1.06	ALIGNED	15.69	0
hCoV-19/Italy/INMI1-isl/2020|EPI_ISL_410545|2020-01-29_N	GFYAEGSR	Q10848_MS20-028_naso4	443.706	2	6807565	0.9591	0.7	708041	15.93+/-1.06	ALIGNED	15.02	0
hCoV-19/Italy/INMI1-isl/2020|EPI_ISL_410545|2020-01-29_N	GFYAEGSR	Q10849_MS20-028_naso5	443.706	2	880762	0.18	1.2	587199	15.93+/-1.06	ALIGNED	17.51	0
hCoV-19/Italy/INMI1-isl/2020|EPI_ISL_410545|2020-01-29_N	GFYAEGSR	Q10850_MS20-028_naso6	443.706	2	1067068	0.2362	2.8	779445	15.93+/-1.06	ALIGNED	14.83	0
hCoV-19/Italy/INMI1-isl/2020|EPI_ISL_410545|2020-01-29_M	EITVATSR	Q10851_MS20-028_naso8	438.743	2	25243298	0.7814	-0.1	2443796	14.24+/-0.95	TRUE	15.03	0
hCoV-19/Italy/INMI1-isl/2020|EPI_ISL_410545|2020-01-29_N	ADETQALPQR	Q10841_MS20-028_naso7_test_incl-only_z	564.786	2	223017136	0.9401	-1.4	14906881	15.42+/-1.09	TRUE	15.68	0
hCoV-19/Italy/INMI1-isl/2020|EPI_ISL_410545|2020-01-29_N	GFYAEGSR	Q10852_MS20-028_naso9	443.706	2	0	0	#N/A	0	15.93+/-1.06	ALIGNED	#N/A	0
hCoV-19/Italy/INMI1-isl/2020|EPI_ISL_410545|2020-01-29_N	LDDKDPNFK	Q10845_MS20-028_naso1	546.272	2	375900	0.7788	1.3	278098	11.91+/-1.03	ALIGNED	13.57	1
hCoV-19/Italy/INMI1-isl/2020|EPI_ISL_410545|2020-01-29_N	LDDKDPNFK	Q10846_MS20-028_naso2	546.272	2	34474	0.5463	1	114372	11.91+/-1.03	ALIGNED	11.84	1
hCoV-19/Italy/INMI1-isl/2020|EPI_ISL_410545|2020-01-29_N	LDDKDPNFK	Q10847_MS20-028_naso3	546.272	2	129454	0.5463	1	329671	11.91+/-1.03	ALIGNED	11.32	1
hCoV-19/Italy/INMI1-isl/2020|EPI_ISL_410545|2020-01-29_N	LDDKDPNFK	Q10848_MS20-028_naso4	546.272	2	442948	0.6121	-0.9	254449	11.91+/-1.03	FALSE	10.8	1
hCoV-19/Italy/INMI1-isl/2020|EPI_ISL_410545|2020-01-29_N	LDDKDPNFK	Q10849_MS20-028_naso5	546.272	2	219677	0.5832	0.7	515674	11.91+/-1.03	ALIGNED	13.13	1
hCoV-19/Italy/INMI1-isl/2020|EPI_ISL_410545|2020-01-29_N	LDDKDPNFK	Q10850_MS20-028_naso6	546.272	2	200064	0.451	0.8	174010	11.91+/-1.03	ALIGNED	10.55	1
hCoV-19/Italy/INMI1-isl/2020|EPI_ISL_410545|2020-01-29_N	LDDKDPNFK	Q10841_MS20-028_naso7_test_incl-only_z	546.272	2	528553	0.7388	0.4	282475	11.91+/-1.03	ALIGNED	11.34	1
hCoV-19/Italy/INMI1-isl/2020|EPI_ISL_410545|2020-01-29_N	ADETQALPQR	Q10851_MS20-028_naso8	564.786	2	324110496	0.9891	-0.4	14601169	15.42+/-1.09	TRUE	16.06	0
hCoV-19/Italy/INMI1-isl/2020|EPI_ISL_410545|2020-01-29_N	LDDKDPNFK	Q10852_MS20-028_naso9	546.272	2	35793	0.3766	-0.7	130163	11.91+/-1.03	ALIGNED	12.03	1
hCoV-19/Italy/INMI1-isl/2020|EPI_ISL_410545|2020-01-29_N	KKADETQALPQR	Q10845_MS20-028_naso1	692.881	2	0	0	#N/A	0	3.86+/-0.28	ALIGNED	4.98	2
hCoV-19/Italy/INMI1-isl/2020|EPI_ISL_410545|2020-01-29_N	KKADETQALPQR	Q10846_MS20-028_naso2	692.881	2	0	0	#N/A	0	3.86+/-0.28	ALIGNED	#N/A	2
hCoV-19/Italy/INMI1-isl/2020|EPI_ISL_410545|2020-01-29_N	KKADETQALPQR	Q10847_MS20-028_naso3	692.881	2	274517	0.6863	0.9	217938	3.86+/-0.28	ALIGNED	3.59	2
hCoV-19/Italy/INMI1-isl/2020|EPI_ISL_410545|2020-01-29_N	KKADETQALPQR	Q10848_MS20-028_naso4	692.881	2	48604	0.4957	1.4	85148	3.86+/-0.28	ALIGNED	3.63	2
hCoV-19/Italy/INMI1-isl/2020|EPI_ISL_410545|2020-01-29_N	KKADETQALPQR	Q10849_MS20-028_naso5	692.881	2	0	0	#N/A	0	3.86+/-0.28	FALSE	4.74	2
hCoV-19/Italy/INMI1-isl/2020|EPI_ISL_410545|2020-01-29_N	KKADETQALPQR	Q10850_MS20-028_naso6	692.881	2	0	0	#N/A	0	3.86+/-0.28	FALSE	#N/A	2
hCoV-19/Italy/INMI1-isl/2020|EPI_ISL_410545|2020-01-29_N	GFYAEGSR	Q10841_MS20-028_naso7_test_incl-only_z	443.706	2	55809920	0.8651	-3.1	2911331	15.93+/-1.06	TRUE	15.66	0
hCoV-19/Italy/INMI1-isl/2020|EPI_ISL_410545|2020-01-29_N	GFYAEGSR	Q10851_MS20-028_naso8	443.706	2	447993568	0.9985	-0.1	49938832	15.93+/-1.06	TRUE	16.9	0
hCoV-19/Italy/INMI1-isl/2020|EPI_ISL_410545|2020-01-29_N	KKADETQALPQR	Q10852_MS20-028_naso9	692.881	2	85877	0.4957	2.9	171616	3.86+/-0.28	ALIGNED	4.11	2
hCoV-19/Italy/INMI1-isl/2020|EPI_ISL_410545|2020-01-29_N	KKADETQALPQR	Q10845_MS20-028_naso1	462.256	3	34156	0.4957	1.8	84625	4.15+/-0.6	FALSE	4.98	2
hCoV-19/Italy/INMI1-isl/2020|EPI_ISL_410545|2020-01-29_N	KKADETQALPQR	Q10846_MS20-028_naso2	462.256	3	0	0	#N/A	0	4.15+/-0.6	FALSE	#N/A	2
hCoV-19/Italy/INMI1-isl/2020|EPI_ISL_410545|2020-01-29_N	KKADETQALPQR	Q10847_MS20-028_naso3	462.256	3	84035	0.5667	-0.3	142919	4.15+/-0.6	ALIGNED	3.59	2
hCoV-19/Italy/INMI1-isl/2020|EPI_ISL_410545|2020-01-29_N	KKADETQALPQR	Q10848_MS20-028_naso4	462.256	3	246362	0.93	-0.6	180946	4.15+/-0.6	ALIGNED	3.63	2
hCoV-19/Italy/INMI1-isl/2020|EPI_ISL_410545|2020-01-29_N	KKADETQALPQR	Q10849_MS20-028_naso5	462.256	3	15824	0.4957	0	138810	4.15+/-0.6	ALIGNED	4.74	2
hCoV-19/Italy/INMI1-isl/2020|EPI_ISL_410545|2020-01-29_N	KKADETQALPQR	Q10850_MS20-028_naso6	462.256	3	0	0	#N/A	0	4.15+/-0.6	ALIGNED	#N/A	2
hCoV-19/Italy/INMI1-isl/2020|EPI_ISL_410545|2020-01-29_N	KKADETQALPQR	Q10841_MS20-028_naso7_test_incl-only_z	692.881	2	11926590	0.9709	1	855552	3.86+/-0.28	TRUE	3.78	2
hCoV-19/Italy/INMI1-isl/2020|EPI_ISL_410545|2020-01-29_N	KKADETQALPQR	Q10851_MS20-028_naso8	692.881	2	343034752	0.9982	0.9	20707746	3.86+/-0.28	TRUE	4.2	2
hCoV-19/Italy/INMI1-isl/2020|EPI_ISL_410545|2020-01-29_N	KKADETQALPQR	Q10852_MS20-028_naso9	462.256	3	0	0	#N/A	0	4.15+/-0.6	FALSE	4.11	2
hCoV-19/Italy/INMI1-isl/2020|EPI_ISL_410545|2020-01-29_N	KADETQALPQR	Q10845_MS20-028_naso1	628.833	2	0	0	#N/A	0	6.97+/-1.11	FALSE	9.15	1
hCoV-19/Italy/INMI1-isl/2020|EPI_ISL_410545|2020-01-29_N	KADETQALPQR	Q10846_MS20-028_naso2	628.833	2	117780	0.5169	-3.3	247534	6.97+/-1.11	FALSE	5.82	1
hCoV-19/Italy/INMI1-isl/2020|EPI_ISL_410545|2020-01-29_N	KADETQALPQR	Q10847_MS20-028_naso3	628.833	2	0	0	#N/A	0	6.97+/-1.11	FALSE	6.89	1
hCoV-19/Italy/INMI1-isl/2020|EPI_ISL_410545|2020-01-29_N	KADETQALPQR	Q10848_MS20-028_naso4	628.833	2	0	0	#N/A	0	6.97+/-1.11	ALIGNED	#N/A	1
hCoV-19/Italy/INMI1-isl/2020|EPI_ISL_410545|2020-01-29_N	KADETQALPQR	Q10849_MS20-028_naso5	628.833	2	0	0	#N/A	0	6.97+/-1.11	FALSE	#N/A	1
hCoV-19/Italy/INMI1-isl/2020|EPI_ISL_410545|2020-01-29_N	KADETQALPQR	Q10850_MS20-028_naso6	628.833	2	0	0	#N/A	0	6.97+/-1.11	ALIGNED	6.77	1
hCoV-19/Italy/INMI1-isl/2020|EPI_ISL_410545|2020-01-29_N	KKADETQALPQR	Q10841_MS20-028_naso7_test_incl-only_z	462.256	3	14375865	0.9783	0	970561	4.15+/-0.6	TRUE	3.78	2
hCoV-19/Italy/INMI1-isl/2020|EPI_ISL_410545|2020-01-29_N	KKADETQALPQR	Q10851_MS20-028_naso8	462.256	3	403954528	0.9956	0.1	25085042	4.15+/-0.6	TRUE	4.2	2
hCoV-19/Italy/INMI1-isl/2020|EPI_ISL_410545|2020-01-29_N	KADETQALPQR	Q10852_MS20-028_naso9	628.833	2	0	0	#N/A	0	6.97+/-1.11	ALIGNED	#N/A	1
hCoV-19/Italy/INMI1-isl/2020|EPI_ISL_410545|2020-01-29_N	KADETQALPQR	Q10845_MS20-028_naso1	419.558	3	37672	0.2347	0.1	163950	7.3+/-1.15	ALIGNED	9.15	1
hCoV-19/Italy/INMI1-isl/2020|EPI_ISL_410545|2020-01-29_N	KADETQALPQR	Q10846_MS20-028_naso2	419.558	3	117720	0.6559	2.5	129442	7.3+/-1.15	FALSE	5.82	1
hCoV-19/Italy/INMI1-isl/2020|EPI_ISL_410545|2020-01-29_N	KADETQALPQR	Q10847_MS20-028_naso3	419.558	3	25448	0.5169	-1.2	65710	7.3+/-1.15	ALIGNED	6.89	1
hCoV-19/Italy/INMI1-isl/2020|EPI_ISL_410545|2020-01-29_N	KADETQALPQR	Q10848_MS20-028_naso4	419.558	3	0	0	#N/A	0	7.3+/-1.15	ALIGNED	#N/A	1
hCoV-19/Italy/INMI1-isl/2020|EPI_ISL_410545|2020-01-29_N	KADETQALPQR	Q10849_MS20-028_naso5	419.558	3	0	0	#N/A	0	7.3+/-1.15	ALIGNED	#N/A	1
hCoV-19/Italy/INMI1-isl/2020|EPI_ISL_410545|2020-01-29_N	KADETQALPQR	Q10850_MS20-028_naso6	419.558	3	31854	0.2347	-1.4	109260	7.3+/-1.15	ALIGNED	6.77	1
hCoV-19/Italy/INMI1-isl/2020|EPI_ISL_410545|2020-01-29_N	KADETQALPQR	Q10841_MS20-028_naso7_test_incl-only_z	628.833	2	18250228	0.8563	0.2	1661435	6.97+/-1.11	TRUE	7.08	1
hCoV-19/Italy/INMI1-isl/2020|EPI_ISL_410545|2020-01-29_N	KADETQALPQR	Q10851_MS20-028_naso8	628.833	2	289559744	0.9915	2.9	11896897	6.97+/-1.11	TRUE	8.04	1
hCoV-19/Italy/INMI1-isl/2020|EPI_ISL_410545|2020-01-29_N	KADETQALPQR	Q10852_MS20-028_naso9	419.558	3	0	0	#N/A	0	7.3+/-1.15	ALIGNED	#N/A	1
hCoV-19/Italy/INMI1-isl/2020|EPI_ISL_410545|2020-01-29_N	ADETQALPQR	Q10845_MS20-028_naso1	564.786	2	316146	0.6832	-1.5	346991	15.42+/-1.09	ALIGNED	17.05	0
hCoV-19/Italy/INMI1-isl/2020|EPI_ISL_410545|2020-01-29_N	ADETQALPQR	Q10846_MS20-028_naso2	564.786	2	543245	0.7322	-1	276825	15.42+/-1.09	ALIGNED	15.34	0
hCoV-19/Italy/INMI1-isl/2020|EPI_ISL_410545|2020-01-29_N	ADETQALPQR	Q10847_MS20-028_naso3	564.786	2	1641656	0.5281	-0.5	376470	15.42+/-1.09	ALIGNED	14.66	0
hCoV-19/Italy/INMI1-isl/2020|EPI_ISL_410545|2020-01-29_N	ADETQALPQR	Q10848_MS20-028_naso4	564.786	2	592820	0.2209	1.5	369953	15.42+/-1.09	ALIGNED	14.06	0
hCoV-19/Italy/INMI1-isl/2020|EPI_ISL_410545|2020-01-29_N	ADETQALPQR	Q10849_MS20-028_naso5	564.786	2	1538095	0.8974	-0.8	737287	15.42+/-1.09	ALIGNED	16.42	0
hCoV-19/Italy/INMI1-isl/2020|EPI_ISL_410545|2020-01-29_N	ADETQALPQR	Q10850_MS20-028_naso6	564.786	2	67722	0.5683	0.9	114669	15.42+/-1.09	ALIGNED	13.75	0
hCoV-19/Italy/INMI1-isl/2020|EPI_ISL_410545|2020-01-29_N	KADETQALPQR	Q10841_MS20-028_naso7_test_incl-only_z	419.558	3	8244984	0.8629	0.2	806052	7.3+/-1.15	TRUE	7.08	1
hCoV-19/Italy/INMI1-isl/2020|EPI_ISL_410545|2020-01-29_N	KADETQALPQR	Q10851_MS20-028_naso8	419.558	3	141867936	0.9846	2.6	5753249	7.3+/-1.15	TRUE	8.04	1
hCoV-19/Italy/INMI1-isl/2020|EPI_ISL_410545|2020-01-29_N	ADETQALPQR	Q10852_MS20-028_naso9	564.786	2	1067451	0.5012	0.3	368345	15.42+/-1.09	ALIGNED	15.72	0
